# Supplementary material for: Evaluation of Heterogeneous Catalytic Ozonation for Micropollutants Removal from Wastewater: Application of a Pre-Industrial-Scale Unit
Source: MDPI journal article supplement (doi:10.3390/catal14040227), 2024-03-28
Supplement: s1 [file s1]

## Supplementary Material

for

### Evaluation of heterogenous catalytic ozonation for micropollutants' removal from wastewater. Application of a pre-industrial level unit.

Efthimia Kaprara<sup>1,\*</sup>, Savvina Psaltou<sup>2</sup>, Maria Salapasidou<sup>3</sup>, Stefanos Kalandaridis<sup>3</sup>, Panagiota-Aikaterini Palasantza<sup>3</sup>, Georgios Germanidis<sup>3</sup>, Panagiotis Diamantopoulos<sup>3</sup>, Manassis Mitrakas<sup>1</sup> and Anastasios Zouboulis<sup>2</sup>

<sup>1</sup> Department of Chemical Engineering, Aristotle University of Thessaloniki, GR-54124, Thessaloniki, Greece; kaprara@auth.gr (E.K.); mmitraka@auth.gr (M.M.)

<sup>2</sup> Department of Chemistry, Aristotle University of Thessaloniki, GR-54124 Thessaloniki, Greece; spsaltou@chem.auth.gr (S.P.); zoubouli@chem.auth.gr (A.Z.)

<sup>3</sup> AKTOR S.A., Wastewater Treatment Plant of Touristic Area of Thessaloniki "AINEIA", GR- 57004, N. Michaniona, Thessaloniki, Greece; msalapasidou@ellaktor.com (M.S.); kpalasantza@aktor.gr (P.-A.P.); pdiamantopoulos@psyt.gr (P.D.)

\* Correspondence: zoubouli@chem.auth.gr

## Contents of the Supplementary Material

### Supplementary Tables

|                                                                                     |   |
|-------------------------------------------------------------------------------------|---|
| Table S1 Specifications of the membrane module used.....                            | 2 |
| Table S2 Main physicochemical characteristics of materials tested as catalysts..... | 2 |
| Table S3 Chemical composition of zeolite .....                                      | 2 |
| Table S4 Sampling Points .....                                                      | 3 |
| Table S5 Physicochemical characteristics of selected micropollutants at 20°C. ....  | 3 |

### Supplementary Figures

|                                                                                                                                                            |   |
|------------------------------------------------------------------------------------------------------------------------------------------------------------|---|
| Figure S1 Diagram (a) and view (b) of wastewater treatment plant "AINEIA" .....                                                                            | 4 |
| Figure S2 Variation of BOD <sub>5</sub> , COD, SS, T-N, NH <sub>4</sub> -N, NO <sub>3</sub> -N and T-P in the influent of WWTP for 2018-2021 .....         | 5 |
| Figure S3 Variation of BOD <sub>5</sub> , COD, SS, T-N, NH <sub>4</sub> -N, NO <sub>3</sub> -N and T-P in the treated effluent of WWTP for 2018-2021 ..... | 6 |
| Figure S4 Detailed flowchart of the pre-industrial level unit.....                                                                                         | 7 |
| Figure S5 Photograph of the pre-industrial level unit.....                                                                                                 | 8 |
| Figure S6 Chemical structures of selected micropollutants.....                                                                                             | 8 |

## Supplementary Tables

**Table S1** Specifications of the membrane module used

| Membrane                                       | PTFE Hollow Fiber |
|------------------------------------------------|-------------------|
| Inner Diameter (mm)                            | 1.47              |
| Outer Diameter (mm)                            | 1.88              |
| Density (g/cm <sup>3</sup> )                   | 0.97              |
| Porosity (%)                                   | 53                |
| Pure Water Flux (L/min/m <sup>2</sup> @ 2 bar) | 180               |
| Water Entry Pressure (bar)                     | 1.93              |
| Maximum Pore Diameter (μm)                     | 0.741             |
| Mean Pore Diameter (μm)                        | 0.589             |
| Minimum Pore Diameter (μm)                     | 0.52              |
| Length, L (m)                                  | 0.96              |
| Effective Contact Area (m <sup>2</sup> )       | 4.8               |
| Number of fibers                               | 846               |

**Table S2** Main physicochemical characteristics of materials tested as catalysts

| Zeolite                                               |         |
|-------------------------------------------------------|---------|
| PZC                                                   | 6.8     |
| IEP                                                   | 2.2     |
| S <sub>BET</sub> , m <sup>2</sup> /g                  | 21      |
| Pore volume, mL/g                                     | 0.164   |
| PET (Polyethylene terephthalate)                      |         |
| PZC                                                   | 6.2     |
| Granule size, mm                                      | 0.8-2.5 |
| Granule Density, g/mL                                 | 0.79    |
| Specific Surface Area, m <sup>2</sup> /m <sup>3</sup> | 405     |

**Table S3** Chemical composition of zeolite

| %                |                                |      |      |                   |                  |                                |      | mg/Kg |                                |
|------------------|--------------------------------|------|------|-------------------|------------------|--------------------------------|------|-------|--------------------------------|
| SiO <sub>2</sub> | Al <sub>2</sub> O <sub>3</sub> | MgO  | CaO  | Na <sub>2</sub> O | K <sub>2</sub> O | Fe <sub>2</sub> O <sub>3</sub> | LOI  | NiO   | Cr <sub>2</sub> O <sub>3</sub> |
| 70.5             | 12.1                           | 0.58 | 2.91 | 1.45              | 2.82             | 0.67                           | 8.9* | ND    | ND                             |

\*Determination at 900 °C as clarified by TG-DTA

**Table S4** Sampling Points

| Symbol | Name                         | Description                                                                                                                                                 |
|--------|------------------------------|-------------------------------------------------------------------------------------------------------------------------------------------------------------|
| P0     | Secondary effluent           | - Secondary treatment effluent wastewater before conventional disinfection (simple ozonation) and<br>- Influent wastewater to the pre-industrial pilot unit |
| P1     | 1 <sup>st</sup> Bed effluent | Effluent wastewater after the post filtration (1 <sup>st</sup> Fix-Bed) in the pre-industrial pilot unit                                                    |
| P2     | Membrane                     | Effluent wastewater after the membrane in the pre-industrial pilot unit                                                                                     |
| P3     | 2 <sup>nd</sup> Bed effluent | Effluent wastewater after the catalytic ozonation (2 <sup>nd</sup> Fix-Bed) in the pre-industrial pilot unit                                                |
| P4     | 3 <sup>rd</sup> Bed effluent | Effluent wastewater after the biological stabilization (3 <sup>rd</sup> Fix-Bed) in the pre-industrial pilot unit                                           |

**Table S5** Physicochemical characteristics of selected micropollutants at 20°C.

| Micropollutant       | Molecular weight | Log D at pH 8 | pK <sub>a</sub> | k <sub>O<sub>3</sub></sub> (M <sup>-1</sup> s <sup>-1</sup> ) | k <sub>OH·</sub> (M <sup>-1</sup> s <sup>-1</sup> ) | Reference |
|----------------------|------------------|---------------|-----------------|---------------------------------------------------------------|-----------------------------------------------------|-----------|
| <b>p-CBA</b>         | 156.6            | -1.15         | 4.07            | 0.15                                                          | 5*10 <sup>9</sup>                                   | [1,2]     |
| <b>Benzotriazole</b> | 119.1            | 1.21          | 9.04            | 20                                                            | 7.6*10 <sup>9</sup>                                 | [1,3]     |
| <b>Paracetamol</b>   | 151.2            | 0.91          | 9.5             | 2.57*10 <sup>6</sup>                                          | 7.1*10 <sup>9</sup>                                 | [1,4]     |
| <b>Caffeine</b>      | 194.2            | -0.55         | 14              | 650                                                           | 4.1*10 <sup>9</sup>                                 | [1,5]     |

## References

1. Mandal, S. Reaction rate constants of hydroxyl radicals with micropollutants and their significance in advanced oxidation processes. *J. Adv. Oxid. Technol.* **2018**, *21*, 178-195.
2. Lan, B., Huang, R., Li, L. Catalytic ozonation of p-chlorobenzoic acid in aqueous solution using Fe-MCM-41 as catalysts. *Chem. Eng. J.* **2013**, *219*, 346-354.
3. Roshani, B., McMaster, I., Rezaei, E., Soltan, J. Catalytic ozonation of benzotriazole over alumina supported transition metal oxide catalysts in water Sep. Purif. Technol. **2014**, *135*, 158-164.
4. El Najjar, N.H., Touffet, A., Deborde, M., Journal, R., Vel Leitner, N.K. Kinetics of paracetamol oxidation by ozone and hydroxyl radicals, formation of transformation products and toxicity. *Sep. Purif. Technol.* **2014**, *136*, 137-143.
5. Zoumpoulis, A.G., Souza, F.S., Petrie, B., Feris, L.A., Kasprzyk-Hordern, B., Wenk, J. Simultaneous ozonation of 90 organic micropollutants including illicit drugs and their metabolites in different water matrices. *Environ. Sci. Water Res. Technol.* **2020**, *6*, 2465-2478.

## Supplementary Figures

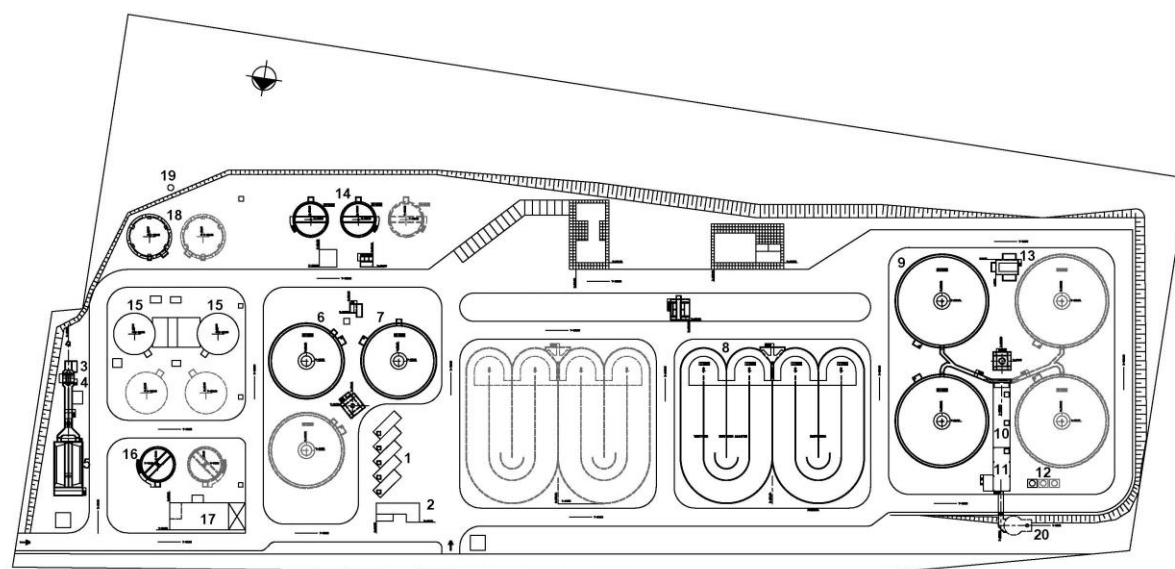

### GENERAL ARRANGEMENT PLAN LEGEND

- 1 SEPTIC WASTEWATER RECEPTION STATION
- 2 SEPTIC WASTEWATER PRETREATMENT UNIT
- 3 INFLOW CHAMBER
- 4 SCREENING STATION
- 5 GRIT & GREASE REMOVAL
- 6 PST (PRIMARY SEDIMENTATION TANK)
- 7 SEPTIC WASTEWATER BALANCING TANK
- 8 BIOREACTOR
- 9 FST (FINAL SEDIMENTATION TANK)

- 10 OZONE CONTACT UNIT
- 11 OZONE PRODUCTION STATION
- 12 LIQUID OXYGEN STORAGE TANK
- 13 RAS & SAS PUMPING STATION
- 14 SLUDGE THICKENERS
- 15 ANAEROBIC SLUDGE DIGESTERS
- 16 SLUDGE POST-THICKENER
- 17 SLUDGE DEWATERING STATION
- 18 GAS HOLDER
- 19 GAS FLARE
- 20 EFFLUENT CHAMBER

### LINE'S LEGEND

- OPERATING UNITS  
 —— FUTURE UNITS

(a)

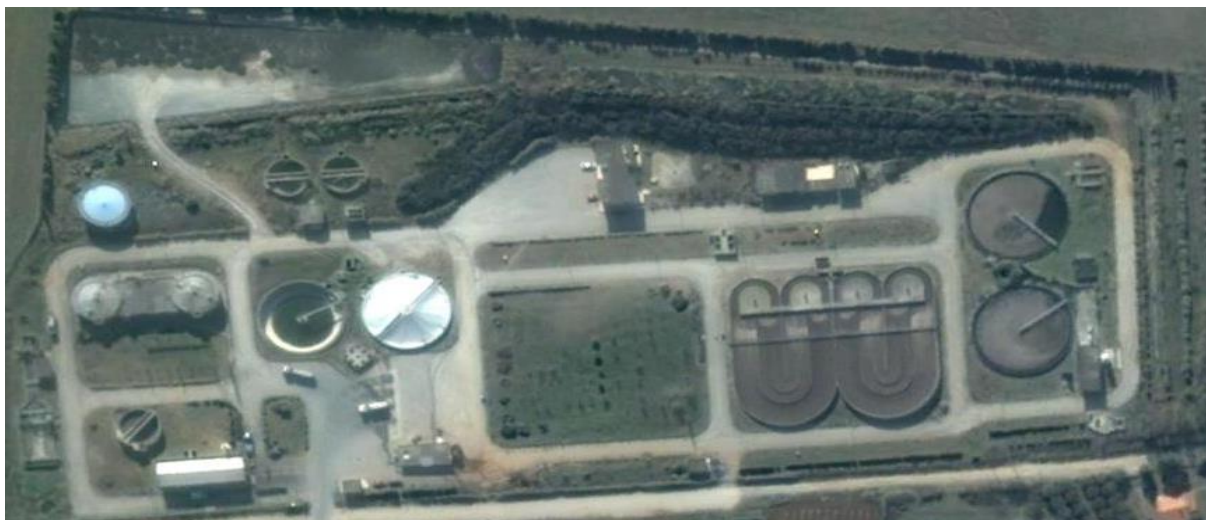

(b)

**Figure S1** Diagram (a) and view (b) of wastewater treatment plant "AINEIA"

### Influent of WWTP

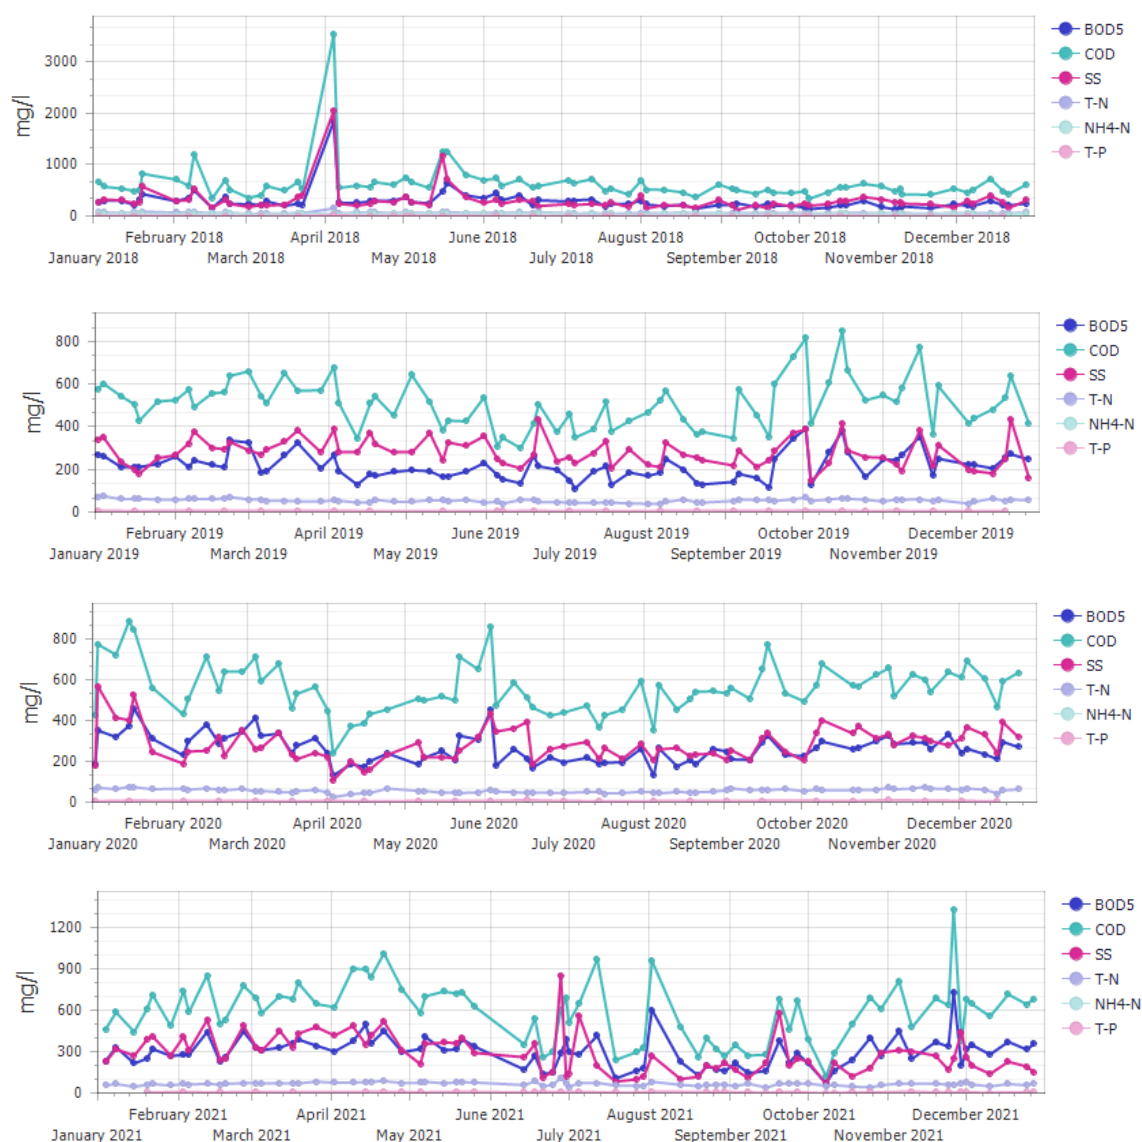

**Figure S2** Variation of BOD<sub>5</sub>, COD, SS, T-N, NH<sub>4</sub>-N, NO<sub>3</sub>-N and T-P in the influent of WWTP for 2018-2021 (Data obtained from <http://astikalimata.ypeka.gr/Services/Pages/WtpViewApp.aspx#>)

where,

BOD<sub>5</sub>: Biological oxygen demand (in five days)

COD: Chemical oxygen demand

SS: Suspended solids

T-N: Total nitrogen

NH<sub>4</sub>-N: Ammonium nitrogen

NO<sub>3</sub>-N: Nitrate nitrogen

T-P: Total phosphorus

### Treated effluent of WWTP

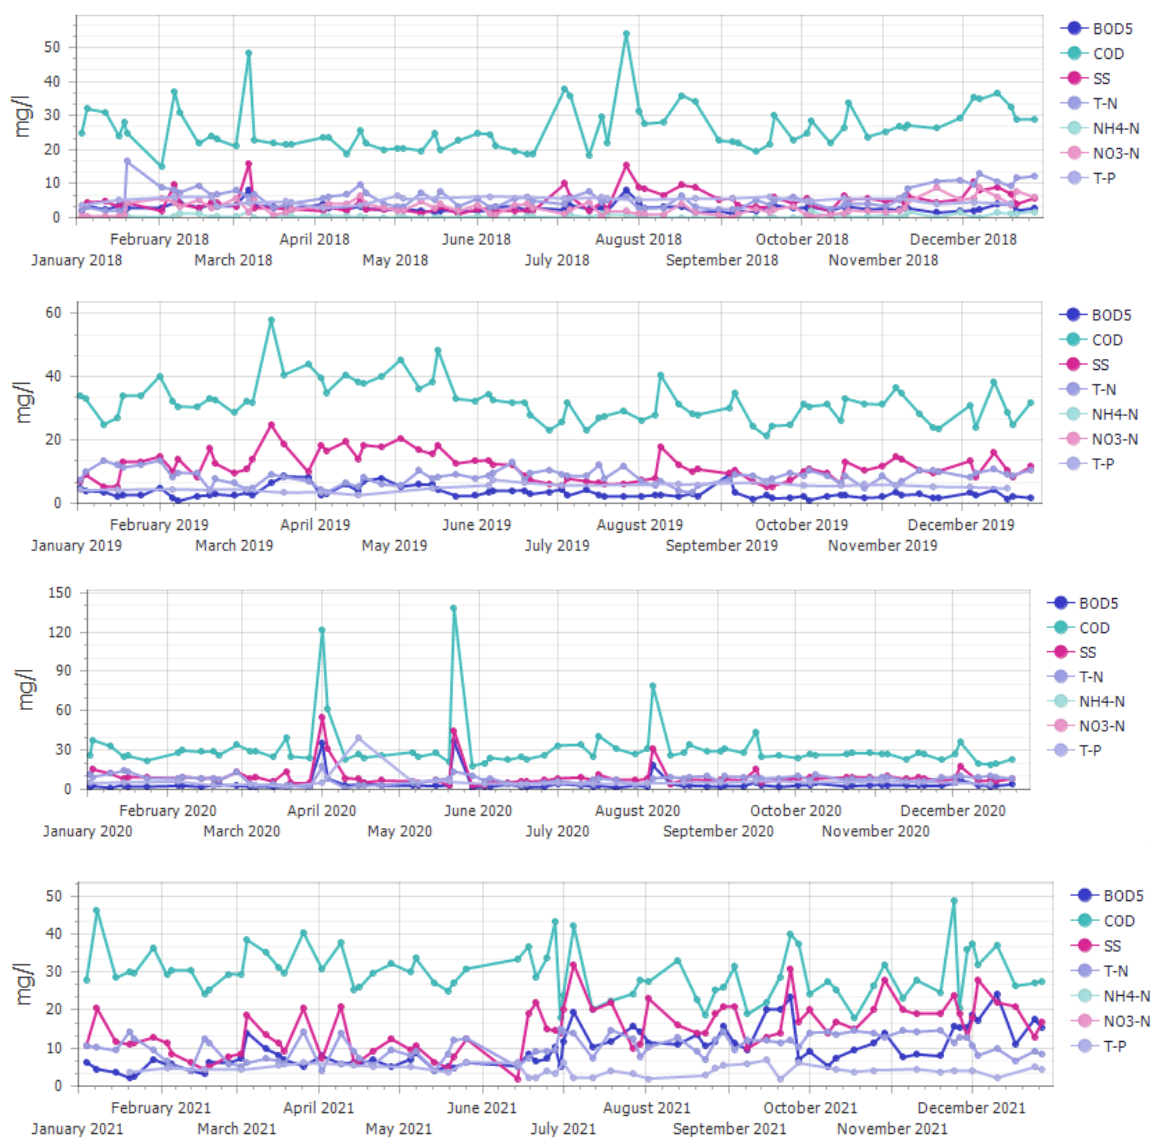

**Figure S3** Variation of BOD<sub>5</sub>, COD, SS, T-N, NH<sub>4</sub>-N, NO<sub>3</sub>-N and T-P in the treated effluent of WWTP for 2018-2021 (Data obtained from <http://astikalimata.ypeka.gr/Services/Pages/WtpViewApp.aspx#>)

where,

BOD<sub>5</sub>: Biological oxygen demand (in five days)

COD: Chemical oxygen demand

SS: Suspended solids

T-N: Total nitrogen

NH<sub>4</sub>-N: Ammonium nitrogen

NO<sub>3</sub>-N: Nitrate nitrogen

T-P: Total phosphorus



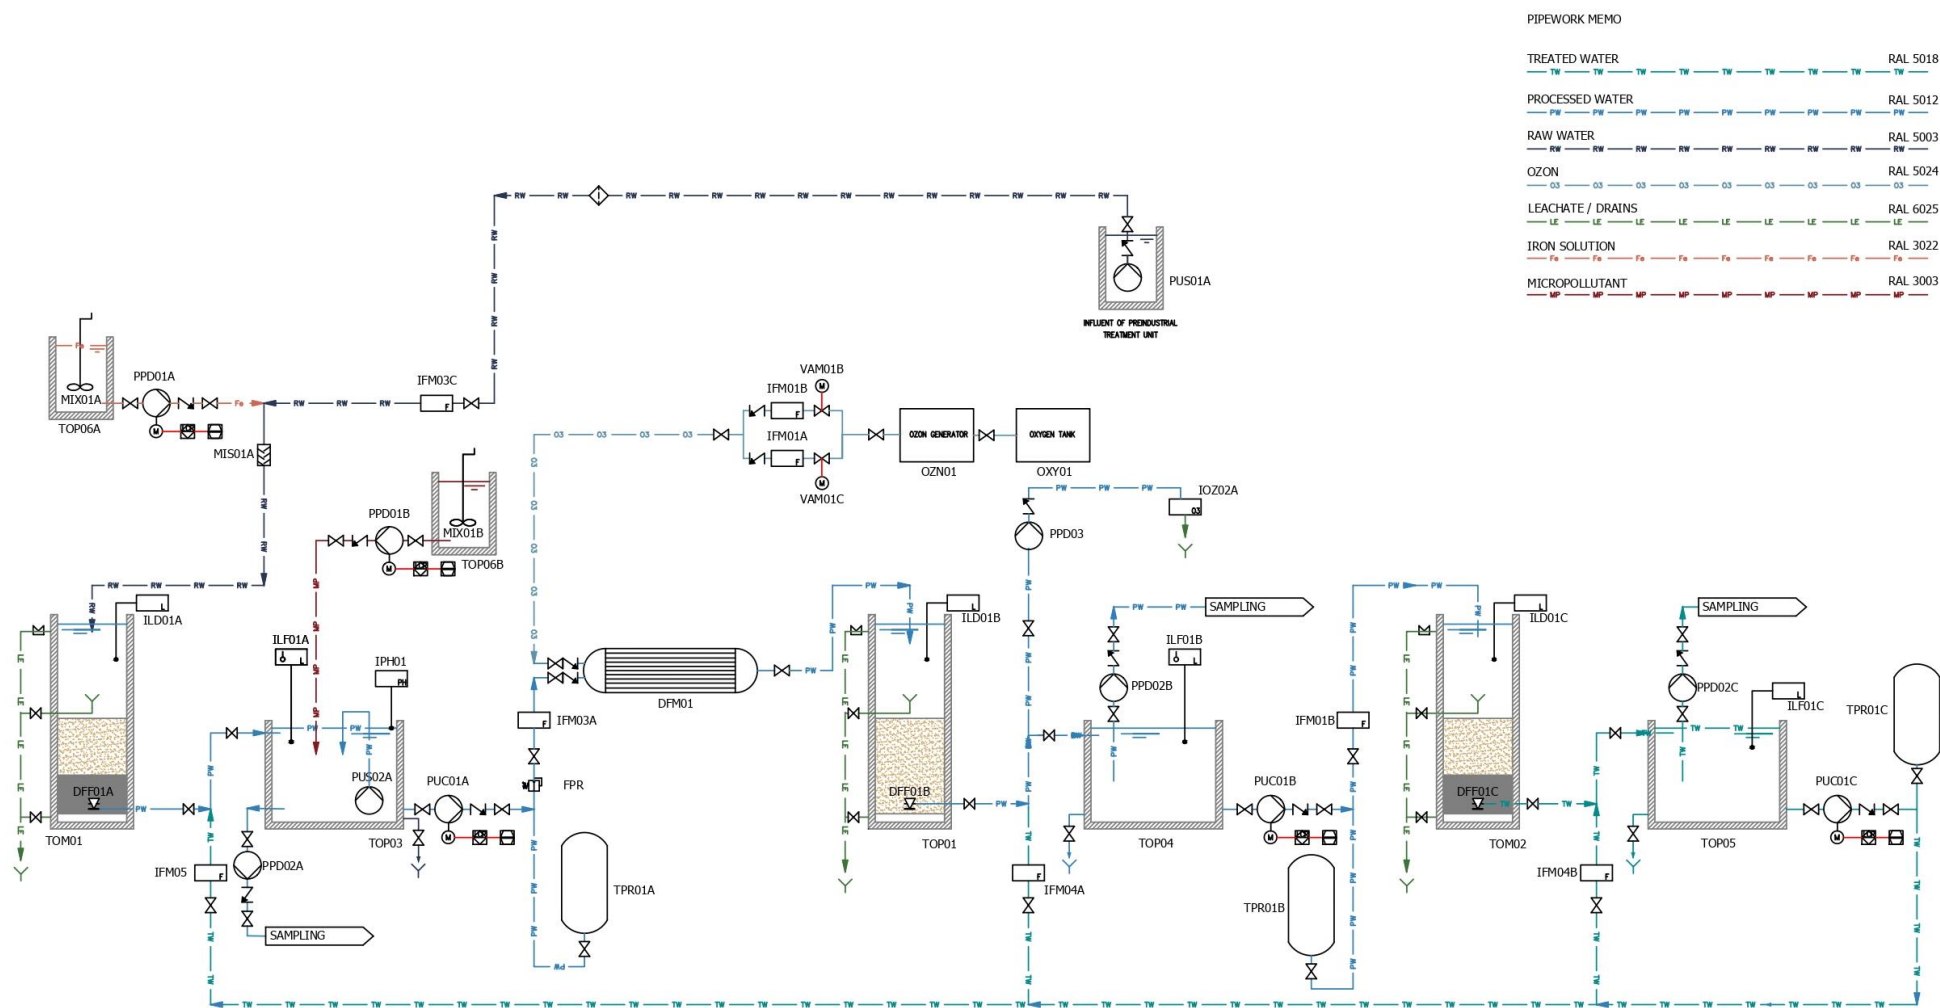

**Figure S4** Detailed flowchart of the pre-industrial level unit

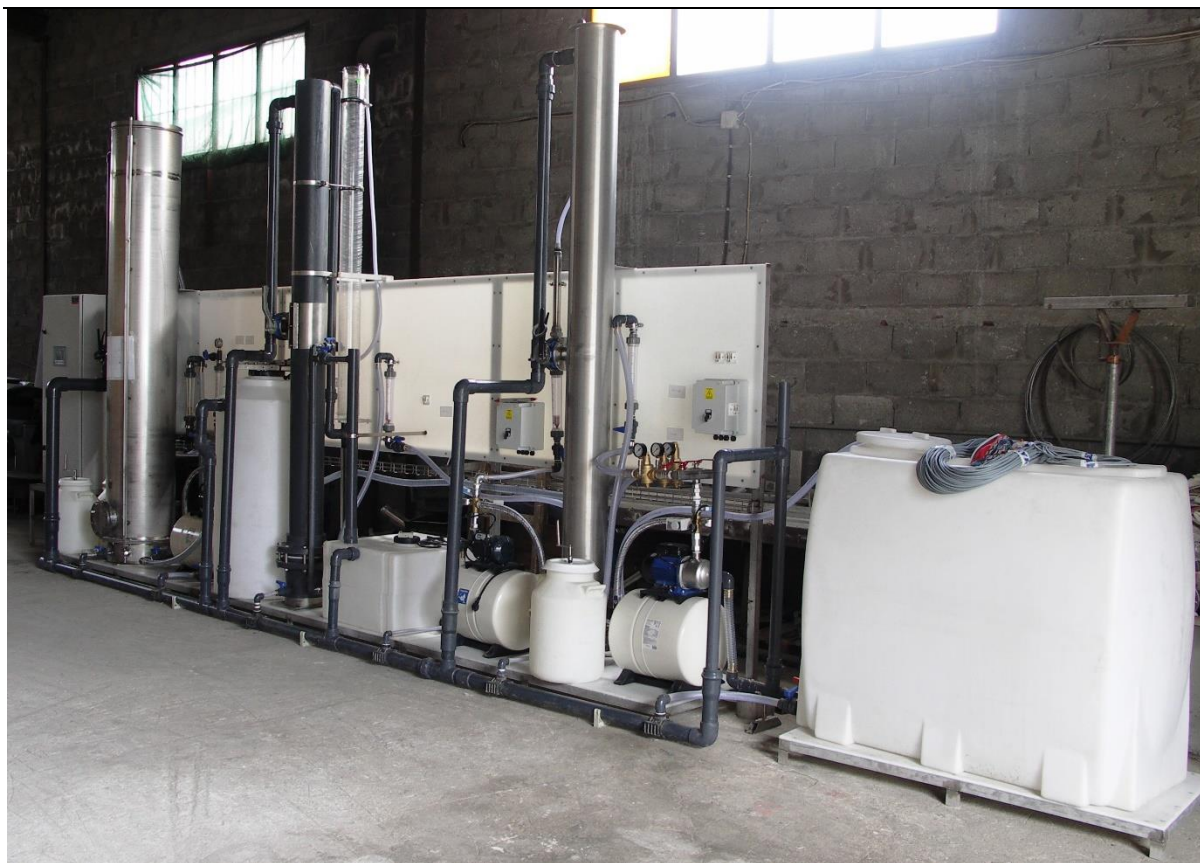

**Figure S5** Photograph of the pre-industrial level unit

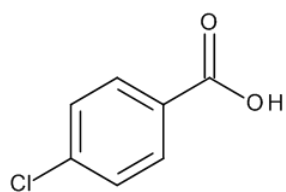

**p-Chlorobenzoic acid**

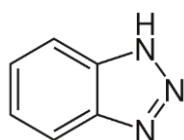

**Benzotriazole**

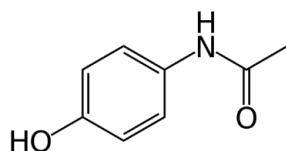

**Paracetamol**

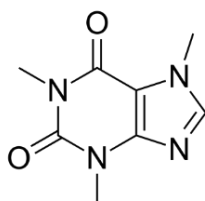

**Caffeine**

**Figure S6** Chemical structures of selected micropollutants
